# Supplementary material for: Roles of the methyl and methylene groups of mercapto acids in the photoluminescence efficiency and carrier trapping dynamics of CdTe QDs
Source: Royal Society of Chemistry journal article supplement (doi:10.1039/c6cp07211a), 2016-11-30
Supplement: c6cp07211a1.pdf [file c6cp07211a1.pdf]

## Supporting Information

### **Role of the Methyl and Methylene Groups of Mercapto Acids on the Photoluminescence Efficiency and Carrier Trapping Dynamics of CdTe QDs**

M. Chandra Sekhar, Apurba De, Sk Saddam Hossain, Anunay Samanta\*  
*School of Chemistry, University of Hyderabad, Hyderabad 500046, India*

#### **Contents**

**Figure S1:** TEM images of CdTe QDs with TOP/OA (a), 2-MPA (b), MEA (c), 3-MBA (d) and 3-MPA (e) as capping agents.

**Figure S2:** Comparison of the 1S bleach recovery kinetics of (a) 3-MBA-capped (b) MEA-capped and (c) 2-MPA-capped CdTe QDs measured at 620 nm. The kinetic data were fitted to  $\Delta A(t) = c + a_1 \exp(-t/\tau_1) + a_2 \exp(-t/\tau_2)$  and the recovery parameters are presented in Table 3. The percentages indicate the amount of bleach recovered with the 0-250 ps time domain.

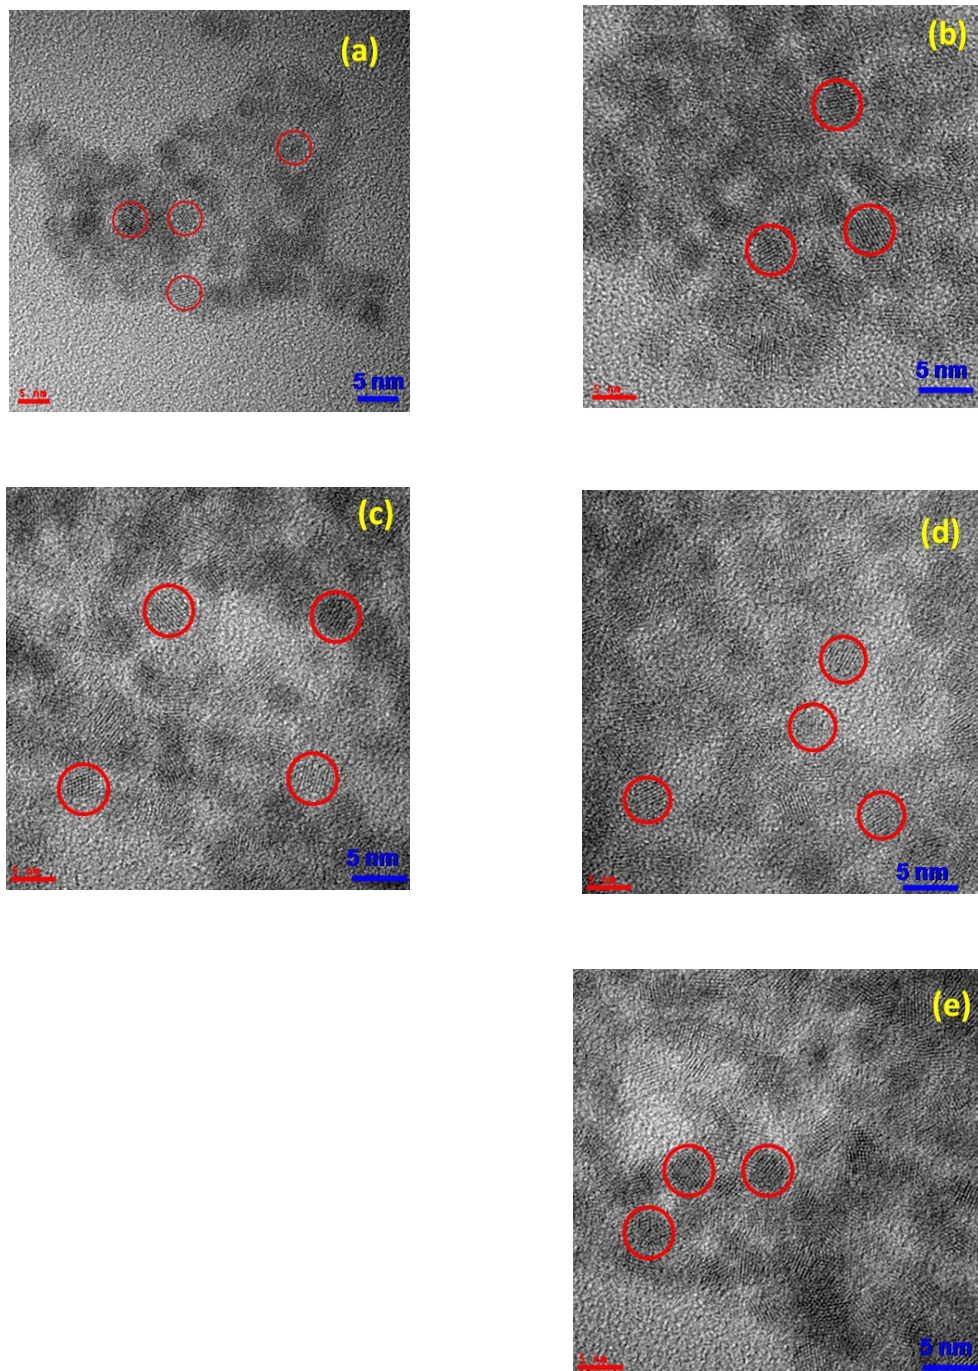

**Figure S1:** TEM images of CdTe QDs with TOP/OA (a), 2-MPA (b), MEA (c), 3-MBA (d) and 3-MPA (e) as capping agents.

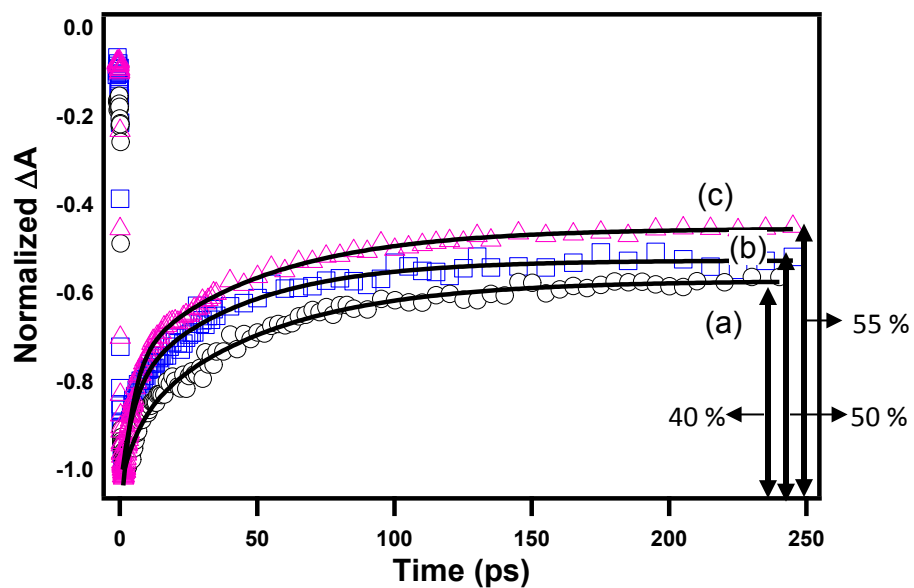

**Figure S2:** Comparison of the 1S bleach recovery kinetics of (a) 3-MBA-capped (b) MEA-capped and (c) 2-MPA-capped CdTe QDs measured at 620 nm. The kinetic data were fitted to  $\Delta A(t) = c + a_1 \exp(-t/\tau_1) + a_2 \exp(-t/\tau_2)$  and the recovery parameters are presented in Table 3. The percentages indicate the amount of bleach recovered with the 0-250 ps time domain.
